# Supplementary material
Source: PubMed Central journal article supplement (PMC2941292)
Supplement: 1010662107_pnas.1010662107_SI.pdf [file 1010662107_pnas.1010662107_SI.pdf]

# Supporting Information

Pluciennik et al. 10.1073/pnas.1010662107

## SI Text

**SI Materials and Methods. Protein and DNA preparations.** Protein preparations used in this study are shown in Fig. S1, and unless specified otherwise purity in each case exceeded 95%. Recombinant human MutS $\alpha$  and MutL $\alpha$ , were isolated from baculovirus-infected Sf9 cells according to Blackwell et al. (1). Replication factor C (RFC) was isolated from HeLa cell extracts (purity >90%) as described (2). *Saccharomyces cerevisiae* RFC $\Delta$ N (yRFC $\Delta$ N), lacking the N-terminal ligase homology domain (residues 2–273) of the large subunit was expressed in *Escherichia coli* and isolated as described (2, 3). Proliferating cell nuclear antigen (PCNA) was prepared from *E. coli* harboring plasmid pT7/hPCNA and purified by published methods (2, 4, 5).

PCNA with a N-terminal protein kinase recognition motif and a His<sub>6</sub>-tag (PK-PCNA) was overexpressed in *E. coli* from vector pHKEp (6), kindly provided by Mike O'Donnell (Rockefeller University). PK-PCNA was purified using Ni-NTA and Mono Q chromatography. Briefly, BL21(DE3) LysS cells were transformed with the pHKEp vector, and cell paste (30 g) obtained from an IPTG-induced culture. The cell pellet was resuspended and sonicated in 20 mM Tris-HCl, pH 7.6, 0.5 M NaCl, 5 mM imidazole. Soluble material was loaded onto a 15 mL Ni-NTA column, washed with Tris-HCl, pH 7.6, 0.5 M NaCl, 50 mM imidazole, and bound protein then eluted with 0.5 M imidazole in this buffer. PK-PCNA (~90% pure) was further purified by chromatography on a 1 mL MonoQ column (GE Healthcare), which was eluted with a 100 to 700 mM NaCl gradient in 20 mM Tris-Cl, pH 7.6, 0.5 mM EDTA. PK-PCNA eluted at 450 mM NaCl.

A synthetic peptide (KRRQTSMTDFYHSKRRLIFS) containing the p21 C-terminal PCNA interaction element (7) was purchased from AnaSpec. A scrambled sequence peptide (YDRSKLRTQSHRSFKTIMRF) was employed as control.

The circular 3' G-T heteroduplex contained a strand break 128 bp (8) 3' to the mismatch (as viewed along the shorter path). The corresponding control was an otherwise identical A-T homoduplex. Supercoiled closed circular G-T heteroduplex and control A-T homoduplexes were prepared from f1MR65 and

f1MR66 (9) by ligation in the presence of ethidium bromide (1 molecule/6.4 bp) to result in a negative superhelical density ( $\sigma$ ) of approximately  $-0.12$ , approximately twice that of plasmid DNA isolated from a 37 °C *E. coli* culture (10). A  $d(T)_{10}$  sequence was introduced into the viral strand of bacteriophage f1MR1 (11) between positions 5501 and 5502 to yield f1MR74;  $d(A)_{10}$  was introduced at the same location in the viral strand of f1MR3 and f1MR1 (11) to yield f1MR75 and f1MR76, respectively. A 5' G-T heteroduplex containing a strand break 128 bp 5' to the mismatch and a  $d(T)_{10}$  sequence on both strands was prepared from f1MR74 and f1MR75 using methods described previously (12). A corresponding control 5' A-T homoduplex was prepared from f1MR74 and f1MR76. Relaxed closed circular heteroduplex DNAs were prepared from nicked substrates by ligation at 37 °C with T4 DNA ligase (New England Biolabs, 4 cohesive end units/10  $\mu$ L reaction) in 20 mM Tris-HCl, pH 7.6, 1.5 mM ATP, 5 mM MgCl<sub>2</sub>, 125 mM NaCl, 0.05 mg/mL BSA, 1 mM glutathione. 200 (13) or 202 (1) bp linear homoduplex DNAs were synthesized by PCR using f1MR23 or f1MR1 as described, and purified according to Blackwell et al. (1)

**Western blot analysis.** Rabbit anti-yRFC $\Delta$ N antibodies were raised against the native protein and purified on protein A-Sepharose. Samples containing PCNA or yRFC $\Delta$ N were separated by electrophoresis in the presence of SDS on a 4–20% Criterion gel (BioRad) and transferred onto a PVDF membrane. The membrane was blocked for 1 hr at room temperature with 0.01 M Tris-HCl, pH 8.0, 0.15 M NaCl, 1 mM EDTA, 0.1% Triton X-100 containing 5% milk solids (all washes were performed in this buffer). After incubation with anti-yRFC $\Delta$ N for 1 hr at room temperature, the membrane was washed, and then incubated for 1 hr with peroxidase conjugated goat anti-rabbit antibodies (Amersham). Data were visualized using the ECL + system (Amersham). The membrane was then blocked for 1 hr as described above, incubated with rabbit anti-PCNA (Abcam), and processed as described above.

1. Blackwell LJ, Wang S, Modrich P (2001) DNA chain length dependence of formation and dynamics of hMutS $\alpha$ -hMutL $\alpha$ -heteroduplex complexes. *J Biol Chem* 276:33233–33240.
2. Dzantiev L, et al. (2004) A defined human system that supports bidirectional mismatch-provoked excision. *Mol Cell* 15:31–41.
3. Gomes XV, Gary SL, Burgers PM (2000) Overproduction in *Escherichia coli* and characterization of yeast replication factor C lacking the ligase homology domain. *J Biol Chem* 275:14541–14549.
4. Fien K, Stillman B (1992) Identification of replication factor C from *Saccharomyces cerevisiae*: A component of the leading-strand DNA replication complex. *Mol Cell Biol* 12:155–163.
5. Gulbis JM, et al. (1996) Structure of the C-terminal region of p21(WAF1/CIP1) complexed with human PCNA. *Cell* 87:297–306.
6. Kelman Z, Yao N, O'Donnell M (1995) *Escherichia coli* expression vectors containing a protein kinase recognition motif, His<sub>6</sub>-tag and hemagglutinin epitope. *Gene* 166:177–178.
7. Warbrick E, Lane DP, Glover DM, Cox LS (1995) A small peptide inhibitor of DNA replication defines the site of interaction between the cyclin-dependent kinase inhibitor p21WAF1 and proliferating cell nuclear antigen. *Curr Biol* 5:275–282.
8. Genschel J, Modrich P (2009) Functions of MutL $\alpha$ , RPA, and HMGB1 in 5'-directed mismatch repair. *J Biol Chem* 284:21536–21544.
9. Pluciennik A, Modrich P (2007) From the cover: Protein roadblocks and helix discontinuities are barriers to the initiation of mismatch repair. *Proc Natl Acad Sci USA* 104:12709–12713.
10. Bauer WR (1978) Structure and reactions of closed duplex DNA. *Annu Rev Biophys Bioeng* 7:287–313.
11. Su S-S, Lahue RS, Au KG, Modrich P (1988) Mismatch specificity of methyl-directed DNA mismatch correction in vitro. *J Biol Chem* 263:6829–6835.
12. Fang W-H, Modrich P (1993) Human strand-specific mismatch repair occurs by a bidirectional mechanism similar to that of the bacterial reaction. *J Biol Chem* 268:11838–11844.
13. Iyer RR, et al. (2010) MutL $\alpha$  and proliferating cell nuclear antigen share binding sites on MutS $\beta$ . *J Biol Chem* 285:11730–11739.



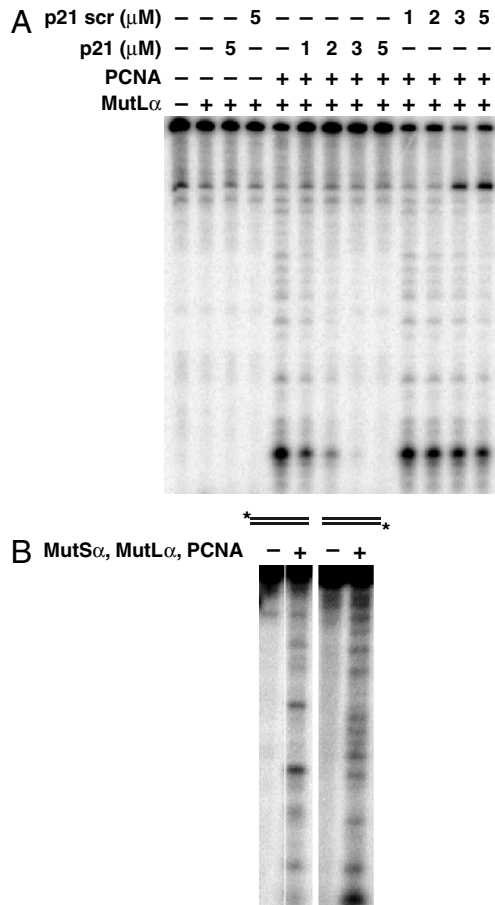

**Fig. S3.** (A) PCNA activation of MutL $\alpha$  in the presence of Mn<sup>2+</sup> is inhibited by p21 peptide. Reactions (*Materials and Methods*) contained 30 mM KCl, 0.5 mM ATP, 1 mM MnSO<sub>4</sub>, 200 bp homoduplex DNA (5'-<sup>32</sup>P labeled on one strand), MutL $\alpha$ , and PCNA as specified. Reactions were supplemented as indicated with a peptide containing the PCNA interaction motif of p21 (p21) or a scrambled sequence peptide (p21 scr). (B) Distribution of incision sites on the two strands of linear homoduplex DNA. Reactions (*Materials and Methods*) containing proteins as indicated were performed as in Fig. 2B using 202 bp linear homoduplex in the presence of 60 mM KCl and 5 mM MgCl<sub>2</sub>. Asterisks indicate location of 5'-<sup>32</sup>P label.



| Homoduplex                                                                                          | Strand     | Endonucleolytic incision (fmol/10 min) |                                          |                                        |                                                   |                                                           |
|-----------------------------------------------------------------------------------------------------|------------|----------------------------------------|------------------------------------------|----------------------------------------|---------------------------------------------------|-----------------------------------------------------------|
|                                                                                                     |            | PCNA<br>MutL $\alpha$                  | PCNA<br>yRFC $\Delta$ N<br>MutL $\alpha$ | PCNA<br>MutL $\alpha$<br>MutS $\alpha$ | yRFC $\Delta$ N<br>MutL $\alpha$<br>MutS $\alpha$ | PCNA<br>yRFC $\Delta$ N<br>MutL $\alpha$<br>MutS $\alpha$ |
| <br>relaxed-bubble | C (closed) | < 0.2                                  | < 0.2                                    | < 0.2                                  | < 0.2                                             | 6.6                                                       |
|                                                                                                     | V (closed) | 0.4                                    | 0.3                                      | 0.3                                    | 0.5                                               | 6.7                                                       |

**Fig. S5.** MutL $\alpha$  incision of bubble-containing relaxed DNA is MutS $\alpha$ -dependent. Bubble-containing A–T DNA was incubated with proteins as indicated (*Materials and Methods*) and incision of viral (V) and complementary (C) DNA strands quantified as described in Fig. 3. Note incision dependence on MutS $\alpha$  (compare columns 4 and 7).
